# Supplementary material
Source: Springer Nature journal article supplement (https://www.springermedizin.de/resource/supplementary/12947_2012_430_MOESM6_ESM.pdf/9555720)

04/06/2009 10:40:03  
S/E: 23/  
SL: 12.0 mm  
Filter: 8  
CC: 1

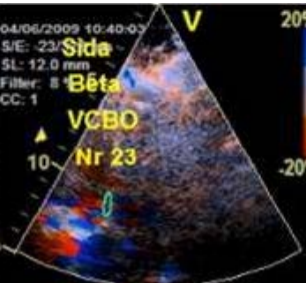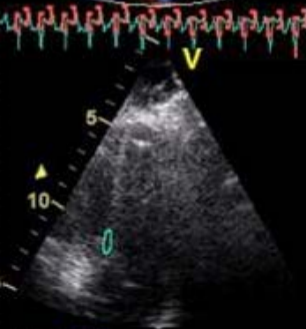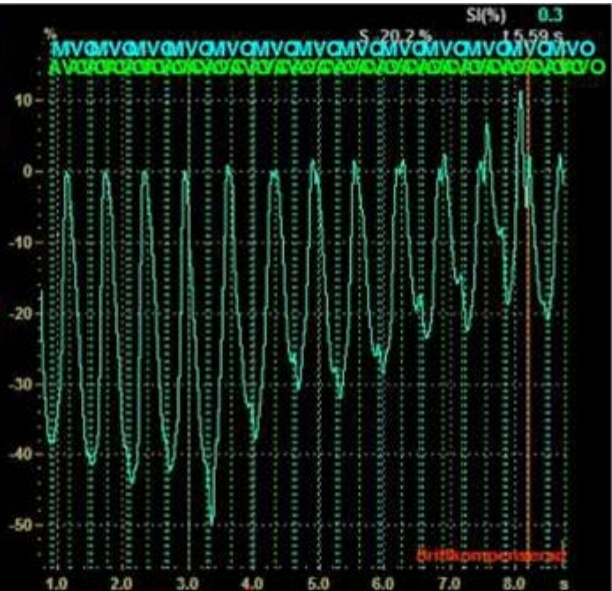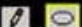

04/06/2009 10:40:03  
S/E: 23/  
SL: 12.0 mm  
Filter: 8  
CC: 1



Ortha.compartarzet

Supplement: MOESM6 [file 9555720]
